# Supplementary material
Source: Springer Nature journal article supplement (https://www.springermedizin.de/resource/supplementary/12936_2011_2143_MOESM1_ESM.pdf/9542622)

Patient reports at malaria clinic

Clinical diagnosis

Return home or routine consultation

Patient registration

Collect blood draw by venipuncture

Rapid diagnostic test using blood

Screen microscopically using smear

( '-' smear and rapid test)

+/-

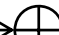

+

Patients with confirmed *P. falciparum* infection enrolled into the study

enrollment

Collect saliva sample

Supernatant of spun saliva tested for *PfHRP2*

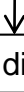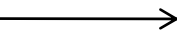

+

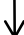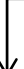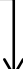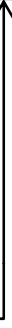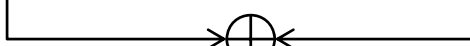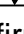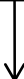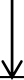

Supplement: MOESM1 [file 9542622]
